# Supplementary material
Source: PubMed Central journal article supplement (PMC124509)
Supplement: pnas_99_10_6949__2.pdf [file pnas_99_10_6949__2.pdf]

**Table 2. Tunnel-lining residues in StarD4 and MLN64-START**

| Amino acid in StarD4 | Atoms                           | Amino acid in MLN64 | Atoms                           | Amino acid in StarD4 | Atoms                                   | Amino acid in MLN64 | Atoms                                      |
|----------------------|---------------------------------|---------------------|---------------------------------|----------------------|-----------------------------------------|---------------------|--------------------------------------------|
| Ile-86               | CA,C,O,CB,CG2                   | Val-300             | CG1                             | Cys-148              | N,CA,C,O,CB                             | Ser-363             | N,CA,C,O                                   |
| Arg-87               | N,CA,C,O,CB,CG,C<br>D,NE        | –                   | –                               | Gly-149              | N,CA,C,O                                | Gly-364             | N,CA,C,O                                   |
| Pro-88               | N,CA,CB,CG,CD                   | Pro-304             | CA,C,O,CB                       | Val-150              | N,CA,C                                  | Ile-365             | N,CA,C,O                                   |
| Arg-92               | CB,CG,CD,NE,CZ,<br>NH1,NH2      | Met-307             | N,CA,C,CB,CG,<br>SD,CE          | Ser-151              | –                                       | Ala-366             | N                                          |
| Leu-93               | –                               | Val-308             | N,CA,CB,CG2                     | Asn-166              | CB,CG,OD1,ND2                           | Asn-383             | CA,C,CB,CG,OD1,<br>ND2                     |
| Asp-96               | CB,CG,OD1,OD2                   | Asn-311             | CB,CG,OD1,ND2                   | His-167              | –                                       | Gly-384             | N,C,O                                      |
| Leu-98               | N,CA,C,O,CB,CG,C<br>D1,CD2      | Thr-313             | CA,C,O,CB,OG1,<br>CG2           | Pro-168              | –                                       | Pro-385             | CA,C,O                                     |
| Met-99               | N,CA,C,CB,CG,<br>SD,CE          | Val-314             | N,CA,CB,CG1,<br>CG2             | Cys-169              | CA,C,O,CB,SG                            | Gly-386             | N,CA,C,O                                   |
| Ser-101              | –                               | Ala-316             | C,O                             | Gly-170              | N,CA,C,O                                | Gly-387             | N,CA,C,O                                   |
| Leu-102              | CG,CD1,CD2                      | Cys-317             | N,CA,CB,SG                      | Trp-171              | N,CB,CG,CD1,<br>CD2,NE1,CE2,<br>CZ2,CH2 | Met-388             | N,CA,CB,CG,SD,<br>CE                       |
| Met-115              | CG,SD,CE                        | Ser-330             | OG                              | Gly-187              | –                                       | Trp-404             | CG,CD1,CD2,NE1,<br>CE2,CE3,CZ2,CZ3,<br>CH2 |
| Tyr-117              | CB,CG,CD1,CD2,<br>CE1,CE2,CZ,OH | Asp-332             | CA,C,O,CB,CG,<br>OD1,OD2        | Tyr-188              | O                                       | Ile-405             | C,O                                        |
| Thr-118              | CA,C,O                          | Val-333             | N,CA,C,O                        | Ile-189              | CA,CB,CG1,CG2,<br>CD1                   | Leu-406             | N,CA,C,CB,CG,<br>CD1,CD2                   |
| Thr-119              | N,CA,C,CB,OG1,<br>CG2           | Ser-334             | N,CA,C,CB,OG                    | Gln-190              | –                                       | Asn-407             | N,CA,C,O,CB                                |
| Ala-120              | C,O                             | Ala-335             | N,CA,C,O,CB                     | Thr-191              | CB,OG1,CG2                              | Thr-408             | CB,OG1,CG2                                 |
| Ser-128              | O                               | Ser-343             | C,O                             | Leu-193              | CB,CG,CD1,CD2                           | Leu-410             | CB,CG,CD1,CD2                              |
| Pro-129              | CA,C                            | Pro-344             | N,CA,C                          | Val-202              | –                                       | Ile-419             | O                                          |
| Arg-130              | N,CA,CB,CG,CD,N<br>E,CZ,NH1,NH2 | Arg-345             | N,CA,CB,CG,CD,N<br>E,CZ,NH1     | Ile-197              | CD1                                     | Leu-414             | –                                          |
| Phe-132              | CG,CD1,CD2,CE1,<br>CE2,CZ       | Phe-347             | CB,CG,CD1,CD2,<br>CE1,CE2       | Ala-205              | CA,C,O,CB                               | Ser-422             | CA,C,O,CB,OG                               |
| Asp-134              | CA,C,O,CB,CG,<br>OD1,OD2        | Asn-349             | CA,C,CB,CG,OD1,<br>ND2          | Met-206              | N,CA,CB,CG,SD,C<br>E                    | Leu-423             | N,CA,CB,CG,CD2                             |
| Phe-135              | N,C,O                           | Val-350             | N,CA,C,O                        | Thr-209              | CA,C,O,CB,OG1,C<br>G2                   | Thr-426             | CB,OG1,CG2                                 |
| Ser-136              | N,CA,C,CB,OG                    | Arg-351             | N,CA,CB,CG,CD,N<br>E,CZ,NH1,NH2 | Leu-210              | N,CA,CB,CG,CD1                          | Met-427             | –                                          |
| Tyr-137              | N                               | Arg-352             | –                               | Asn-212              | C,CB                                    | Glu-429             | –                                          |
| Thr-138              | OG1                             | Ile-353             | –                               | Phe-213              | N,CA,CB,CG,CD1,<br>CD2,CE1,CE2,CZ       | Phe-430             | CB,CG,CD1,CD2,<br>CE1,CE2,CZ               |
| Ser-147              | CA,C,O,CB,OG                    | Ser-362             | CA,C,O,CB,OG                    |                      |                                         |                     |                                            |

The atoms shown for each residue are exposed to the inside of the tunnel. The volume of the tunnel was computed with VOIDOO and is defined as the volume occupied by a rolling probe with a radius of 1.4 Å.
