# Supplementary material
Source: PubMed Central journal article supplement (PMC124509)

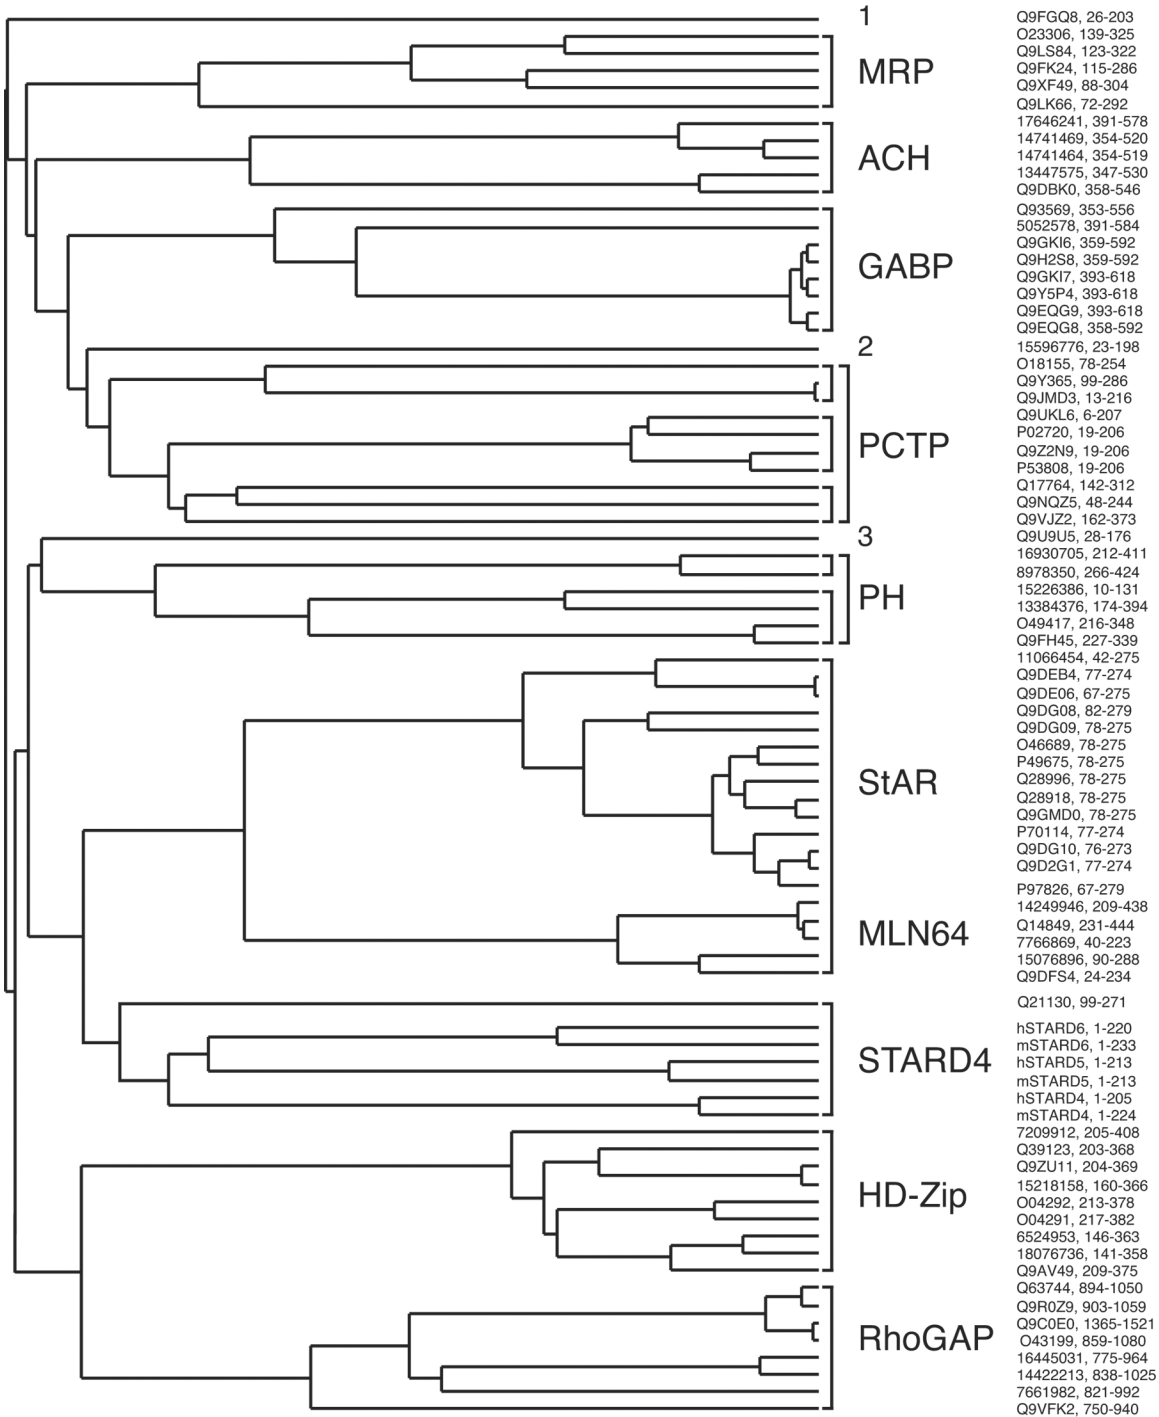

Supplement: pnas_99_10_6949__4.pdf [file pnas_99_10_6949__4.pdf]
